# Supplementary material for: Insights into ionic liquid-enhanced membrane protein stability through machine learning and molecular simulations
Source: Royal Society of Chemistry journal article supplement (doi:10.1039/d5cp02130h), 2025-01-01
Supplement: d5cp02130h1.pdf [file d5cp02130h1.pdf]

## Supporting Information For

### **Insights into ionic liquid-enhanced membrane protein stability through machine learning and molecular simulation**

*Ju Liu<sup>a</sup>, Guiming Zhang<sup>bc</sup>, Cheng Song<sup>d</sup>, Yanlei Wang<sup>b\*</sup>, Jing Ren<sup>e\*</sup>, and Hongyan He<sup>a</sup>*

*<sup>a</sup>Center of Ionic Liquids and Green Energy, Beijing Key Laboratory of Solid State Battery and Energy Storage Process, Institute of Process Engineering, Chinese Academy of Sciences, Beijing 100190, China*

*<sup>b</sup>School of Chemistry and Life Resources, Renmin University of China, Beijing, 100872, China*

*<sup>c</sup>College of Chemistry and Life Science, Beijing University of Technology, 100124, China*

*<sup>d</sup>School of Population and Health, Renmin University of China, Beijing, 100872, China*

*<sup>e</sup>Department of Plastic and Reconstructive Surgery, the First Medical Center, Chinese PLA General Hospital, Beijing 100853, China*

Email: [ylwang17@ruc.edu.cn](mailto:ylwang17@ruc.edu.cn); and [eggy119@163.com](mailto:eggy119@163.com)

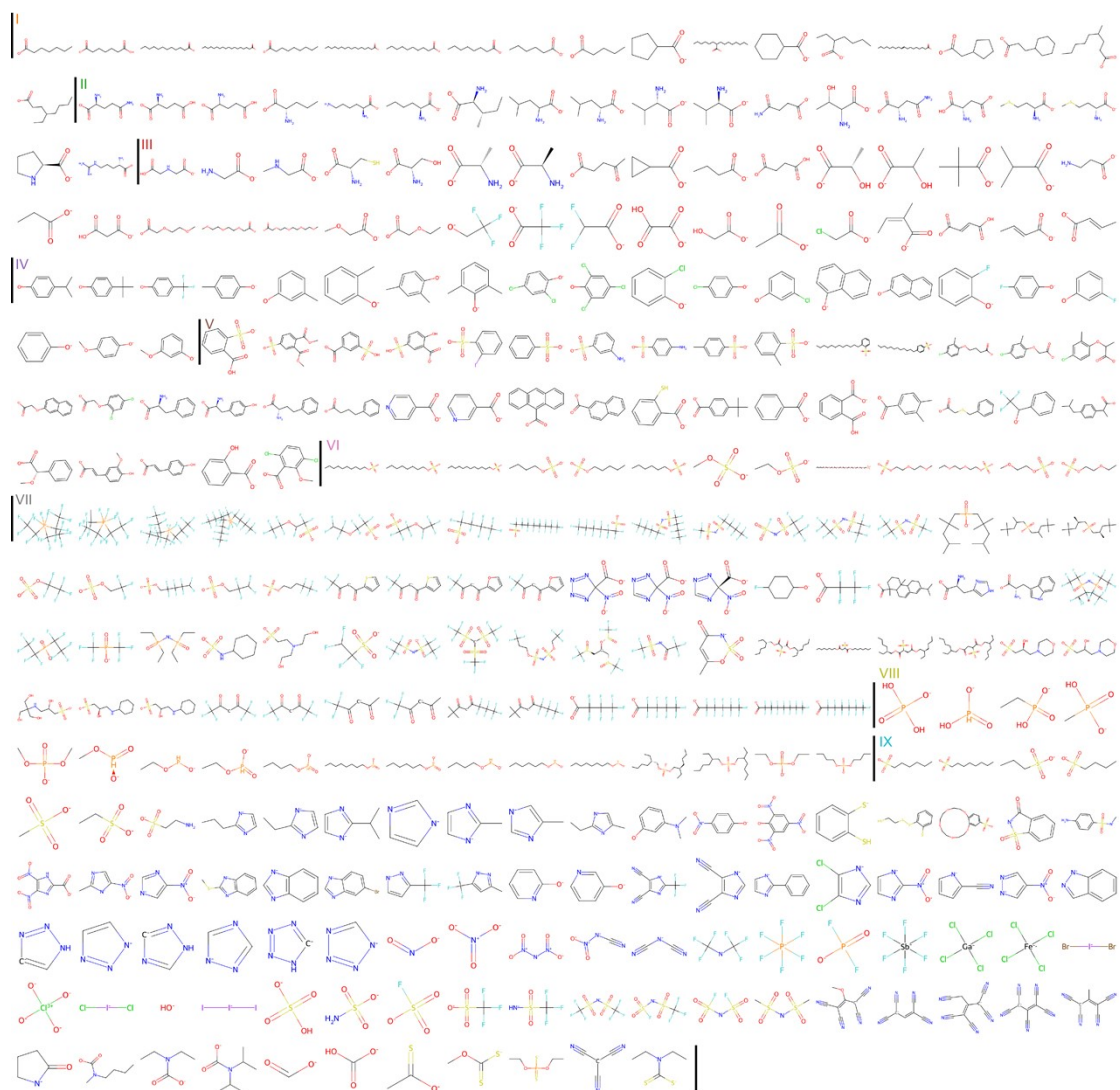

**Fig. S1** The anions are arranged according to hierarchical clustering analysis.

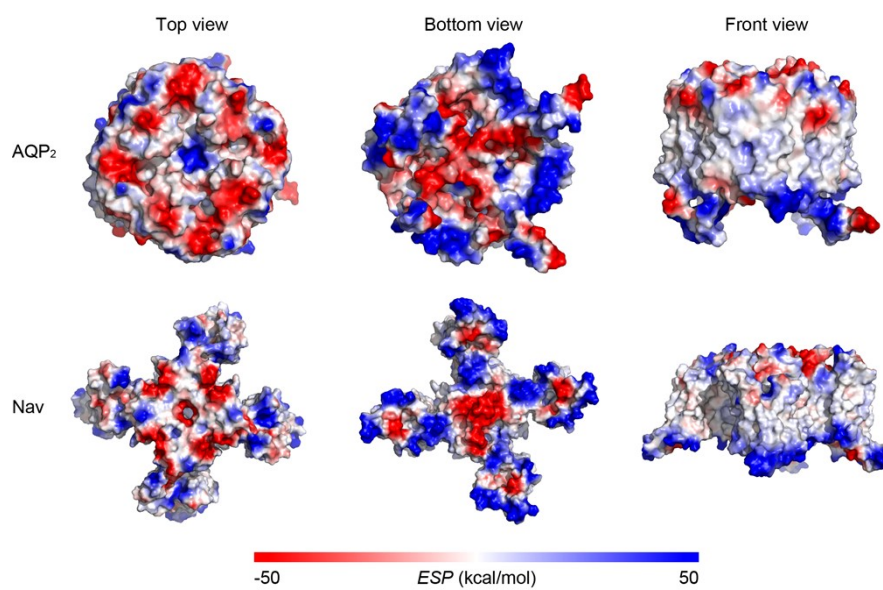

**Fig. S2** Electrostatic potential distribution of the AQP<sub>2</sub> and Nav.

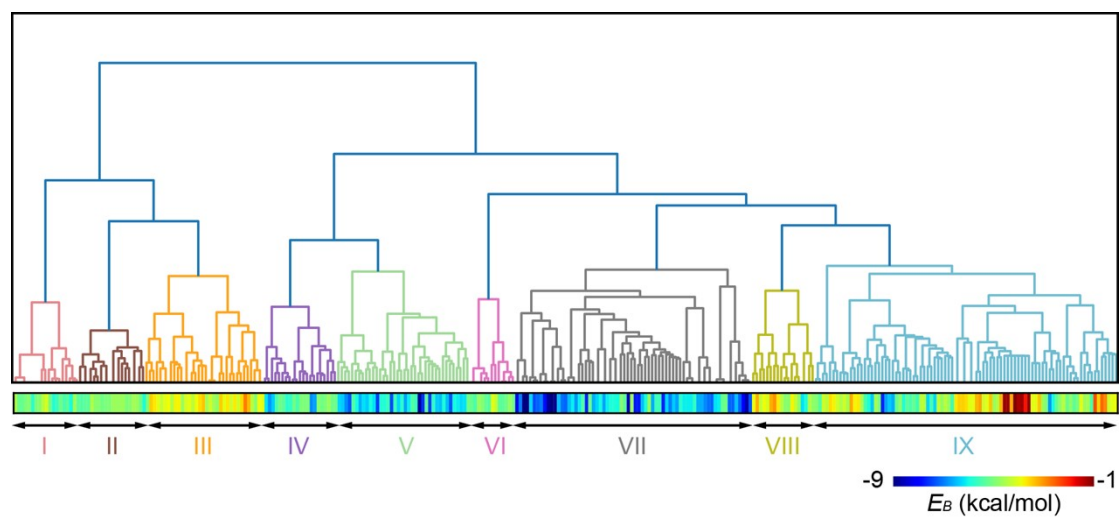

**Fig. S3** Hierarchical clustering dendrogram of anions, and binding energy between Nav and anions.

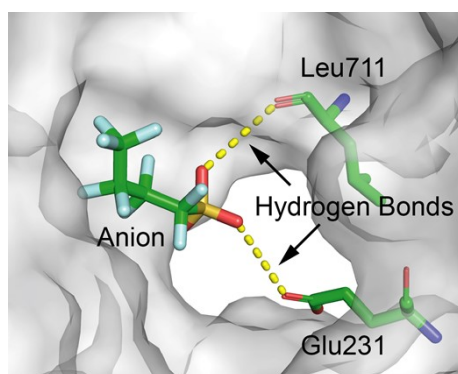

**Fig. S4** The representative anion of cluster VII formed hydrogen bonds with AQP<sub>2</sub> protein at the binding site.

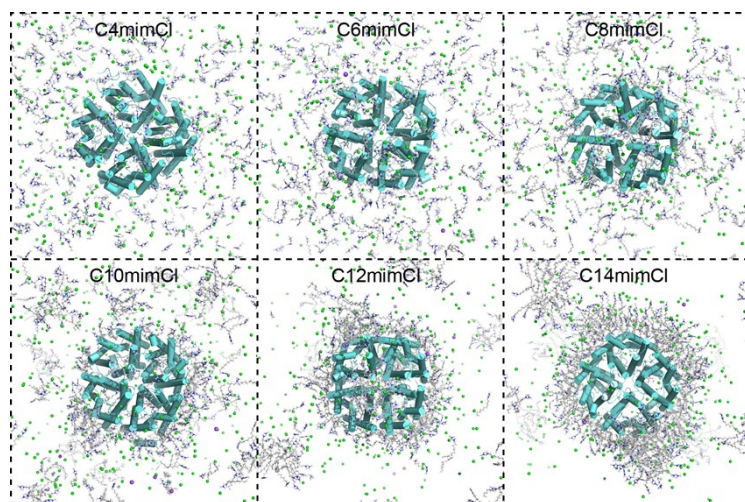

**Fig. S5** Screenshot of simulations for  $[C_n\text{mim}]\text{Cl}$  with different chain length.

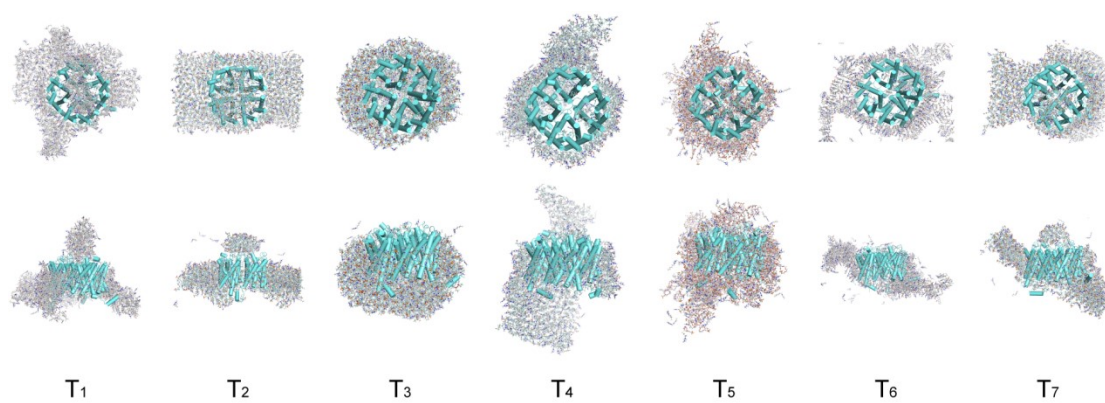

**Fig. S6** Screenshot of simulations for the top 7 anions with the highest  $E_B$

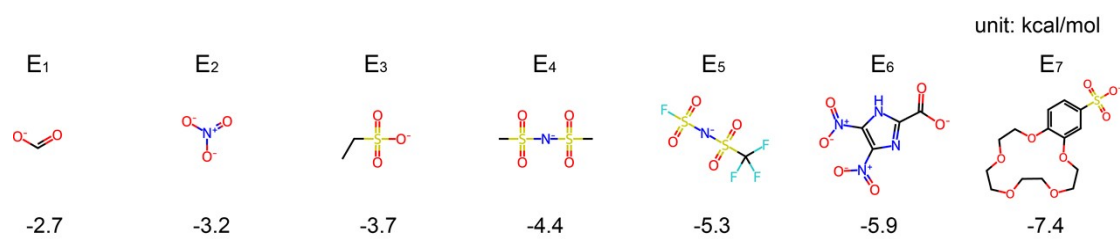

**Fig. S7** Structures of the 7 anions with different  $E_B$  from same cluster.



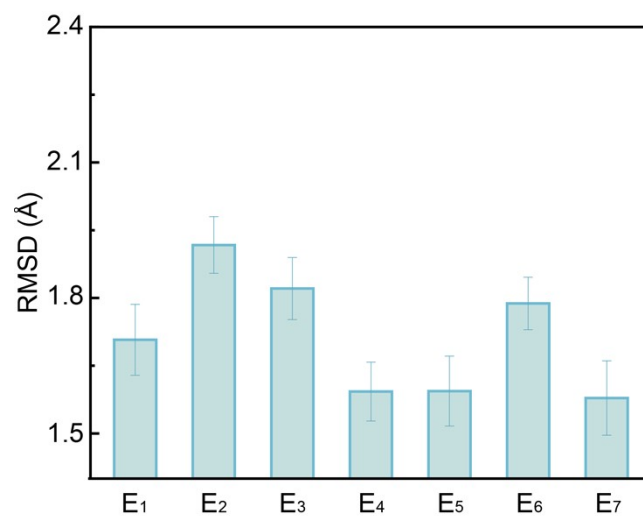

**Fig. S8** The average values of RMSD of the protein in aqueous solutions containing  $[\text{C}_6\text{mim}]^+$  based ILs with different anions, derived from the IX cluster with different  $E_B$ .

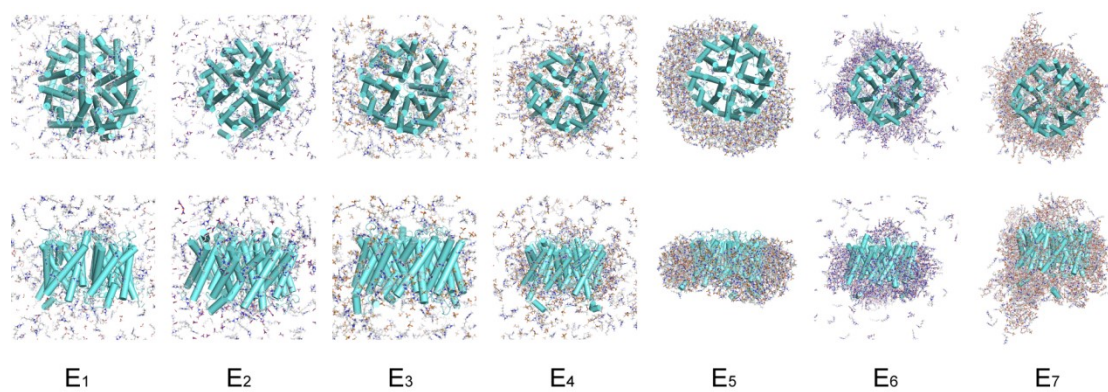

**Fig. S9** Screenshots of simulations for the 7 anions from the same cluster but with different  $E_B$

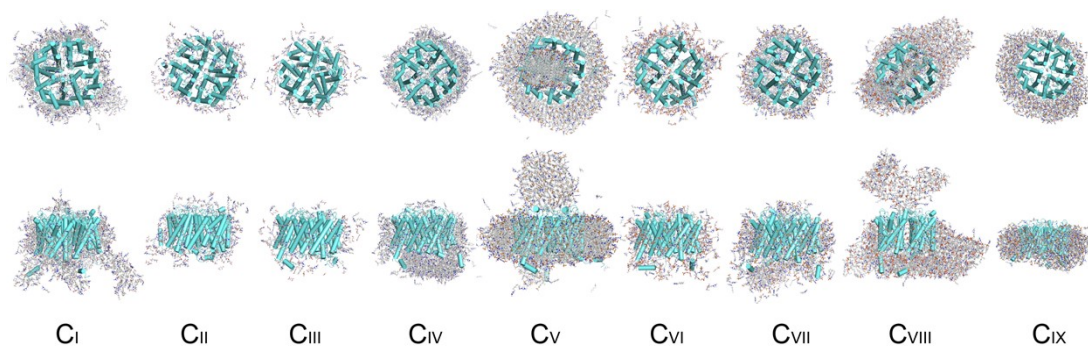

**Fig. S10** Screenshots of simulations for the 9 anions with the same  $E_B$  but from different clusters

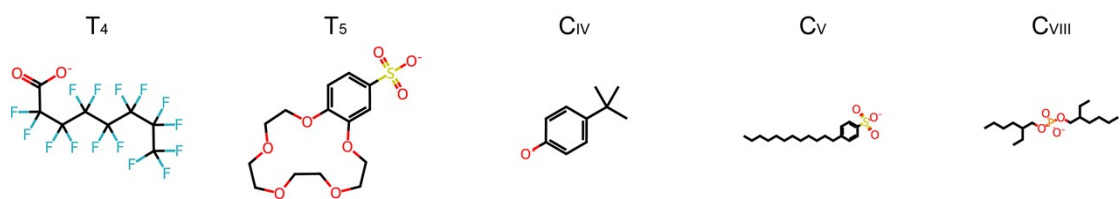

**Fig. S11** Structures of the five screened ILs with the lowest RMSD.

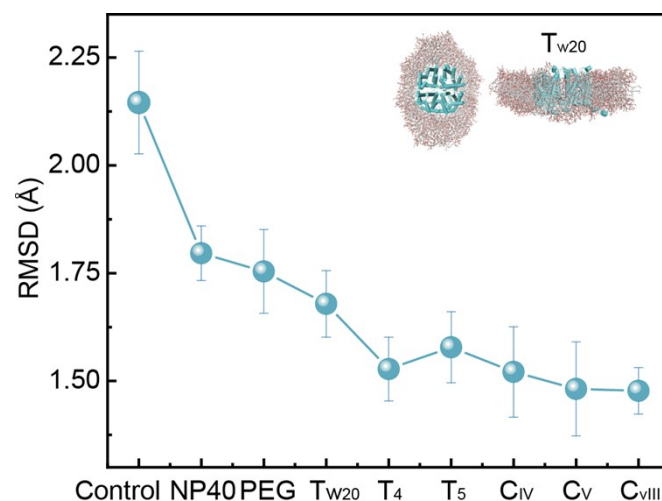

**Fig. S12** The five screened ILs were compared with conventional protein stabilizers regarding their impact on stability of AQP<sub>2</sub>. The inset plots represent the simulation screenshots depicting the adsorption states of Tw20 on the protein surface.

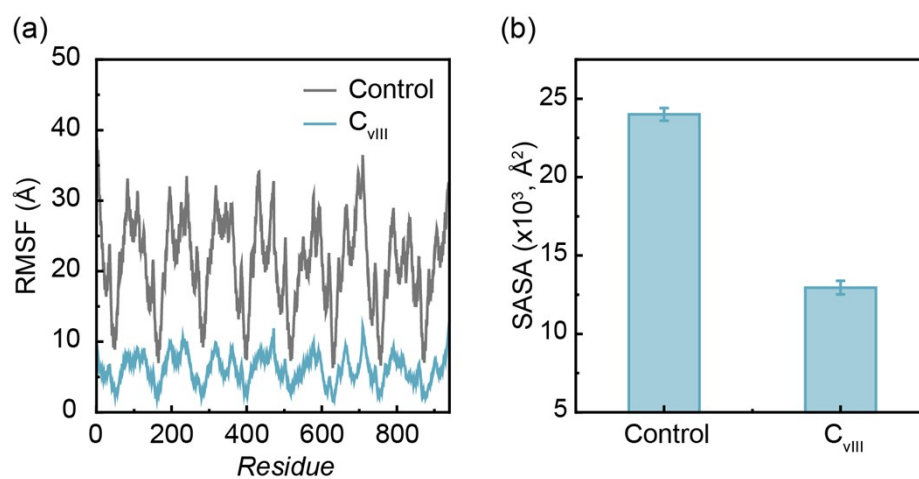

**Fig. S13** (a) Root mean square fluctuation (RMSF) and (b) solvent accessible surface area (SASA) of hydrophobic core of protein in the control group and CIII system.

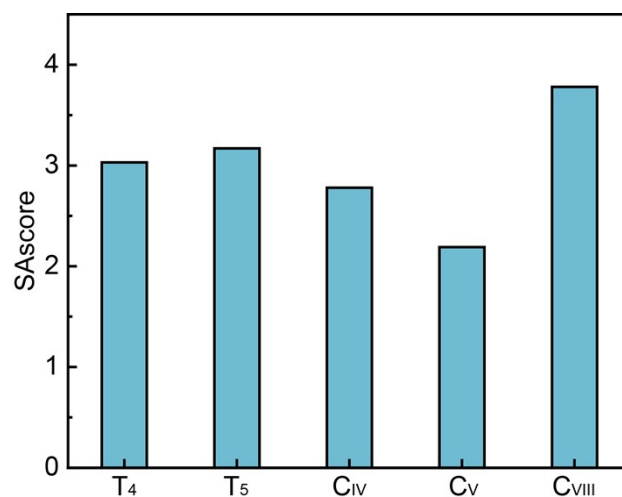

**Fig. S14** The synthetic accessibility score (SAscore) assesses the ease of synthesis for five screened ILs. The SAscore ranges from 1 (easy to synthesize) to 10 (very difficult to synthesize).

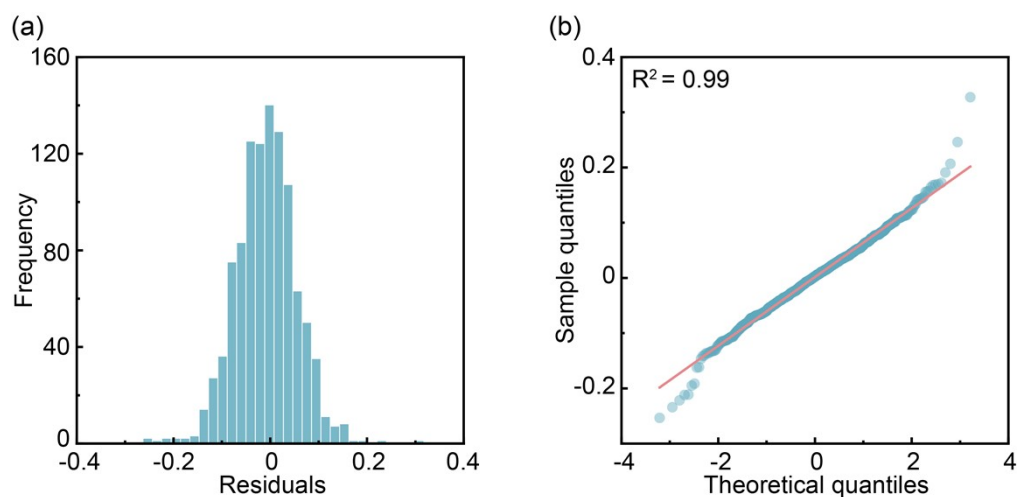

**Fig. S15** (a) The histogram and (b) quantile-quantile plot illustrate the residuals of the model. The histogram shows that the residuals are symmetrically distributed around zero, and most points in the quantile-quantile plot are close to a  $45^\circ$  diagonal line, indicating that the residuals are approximately normally distributed. Therefore, there is no need to apply any transformations to the original data.
